# Supplementary material
Source: Elsevier journal article supplement (https://www.sciencedirect.com/science/article/pii/S0212656717307916)
Supplement: mmc1 [file S0212656717307916:mmc1.docx]

**Table S1.** Health conditions associated to preterm birth and/or foetal death: (ICD10 codes)

*Diabetes (E10-E14)

*Hypertension (I 10-I 15)

*Epilepsy (G40)

*Diseases of the circulatory system (I 00-I 99)

*Malnutrition in pregnancy (O 25)

*Body Mass Index (BMI) <19.8 kg/m2

*Obesity (E65-E68)

*Systemic lupus erythematosus (M32)

*Renal disease (N00-N29)

*Disorders of Thyroid gland (E00-E07)

*Thrombophilia (O 22.3, O 22.5, O 22.8, O22.9)

*Cholestasis of pregnancy (K71)

*Short inter-pregnancy interval

*Cervical incompetence (O 34.3- O34.9)

*Recurrent spontaneous miscarriage (O 06)

*Early foetal death (O 02.1)

*Multiple pregnancy (O 30.0- 0 30.9)

*History of preterm birth (TEPAL formula)

*Smoking (P 04.2)

*Advanced maternal age (>35)

*Other maternal conditions classifiable elsewhere but complicating pregnancy, childbirth, and the puerperium (O 98 y O 99)

*Placental disorders (O43), placenta previa (O44), premature separation of placenta (O45).

*Antepartum haemorrhage, not elsewhere classified (O46)

*Maternal care for poor foetal growth (O36.5)

* Maternal care for other abnormalities of gravid uterus (O34.5)

*Pregnancy care for patient with recurrent pregnancy loss (O26.2)
