# Supplementary material
Source: Elsevier journal article supplement (https://www.sciencedirect.com/science/article/pii/S0212656717307916)
Supplement: mmc2 [file S0212656717307916:mmc2.docx]

**Table S2.** *Drugs contraindicated in Pregnancy*, and *teratogenic, with severe adverse effects, frequently used drugs, whose use may be justified in special circumstances:*

*Contraindicated*

- Androgens G03A*-G03H*,G03X*
- Diethylstilbestrol G03CB02, G03CC05
- Misoprostol A02BB01, G02AD06, M01AE56
- Retinoids (isotretinoin, etretinate y tretinoin) D05BB01, D10BA01, L01XX22, L01XX14
- Retinol (vitamin A) dosage over 5.000 U. A11CA01
- Thalidomide L04AX02

*May be justified in special circumstances:*

- Valproic acid N03AG01
- Antibiotics: aminoglycosides, chloramphenicol and tetracyclines J01GA*, J01GB03-J01GB13, G01AA05,J01BA01,J01AA01-J01AA12, J01AA20, J01AA56, A02BD02, A02BD08, G01AA06, G01AA07, J01AA07, J01AA08
- Methotrexate G01AA07, J01AA07, J01AA08
- Anticoagulants (warfarin or acenocoumarol) B01A*
- Carbamazepine N03AF01
- Cyclophosphamide L01AA01
- Phenobarbital and barbiturates N03AA01-N03AA04, N02AA30
- Phenytoin N03AB02, N03AB04-N03AB05, N03AB52,N03AB54
- Angiotensin converting enzyme inhibitors C09AA*, C09B*
- Antidepressants N06A*
- Antipsychotics N05A*
- Penicillamine N05A*
- Progestagens G03A*, G03D*, G03F*, G03AA-G03AC, G03FA, G03FB, L02AB
- Quinine and Chloroquine M09AA01, M09AA72, P01BA01-P01BA03, P01BA06, P01BC01
